# Supplementary material for: Risk of Adverse Pregnancy Outcomes Associated with Sodium Valproate(VPA): A Disproportionality Analysis Using the FDA Adverse Event Reporting System (FAERS)
Source: Research Square preprint supplement (doi:10.21203/rs.3.rs-6482152/v1), 2025-05-15
Supplement: Supplementary file 1 [file add41ef6037c291ebd4e0b9b.docx]

Table 1S. The breakdown of the SMQ codes

| SMQ codes | SMQ name |
| --- | --- |
| 20000077 | congenital, familial, and genetic disorders |
| 20000186 | pregnancy, labor, and delivery complications, and risk factors |
| 20000190 | fetal disorders |
| 20000191 | neonatal disorders |
| 20000192 | termination of pregnancy and risk of abortion |
| 20000193 | normal pregnancy conditions and outcomes |

Table 2S. 2 × 2 contingency table of disproportionality method.

| Item | Target adverse events reported | Other adverse events reported | Total |
| --- | --- | --- | --- |
| Reports with the target drug | a | b | a+b |
| All other drugs | c | d | c+d |
| Total | a+c | b+d | a+b+c+d |

Table 3S. The principles of disproportionate measurement and the criteria for signal detection.

| Method | Calculation formula | ﻿Criteria |
| --- | --- | --- |
| ROR |  | a ≥ 3  ROR ≥ 1  95%CI (lower limit) > 1 |
|  |
|  |
| PRR |  | a ≥ 3  PRR ≥ 2  95%CI (lower limit) > 1 |
|  |
|  |
| BCPNN |  | IC025>0 |
|  |
|  |
|  |
|  |
| EBGM |  | EBGM05>2 |
|  |
|  |

Abbreviations: BCPNN, bayesian confidence propagation neural network; CI, confidence interval; EBGM, empirical bayesian geometric mean; IC, information component; PRR, proportional reporting ratio; ROR, reporting odds ratio.
